# Supplementary material for: Epigenetic Modulation of Class-Switch DNA Recombination to IgA by miR-146a Through Downregulation of Smad2, Smad3 and Smad4
Source: PubMed Central journal article supplement (PMC8635144; doi:10.3389/fimmu.2021.761450), 2021-11-16
Supplement: Table_1.pdf [file Table_1.pdf]

**Supplementary Table 1. PCR primers used in this study.**

|                                                                                                                 | Forward primer                  | Reverse primer                |
|-----------------------------------------------------------------------------------------------------------------|---------------------------------|-------------------------------|
| <u>Mouse genes</u>                                                                                              |                                 |                               |
| <i>Aicda</i>                                                                                                    | 5'-AGAAAGTCACGCTGGAGACC-3'      | 5'-CTCCTCTTCACCACGTAGCA-3'    |
| <i>Prdm1</i>                                                                                                    | 5'-GCTGCTGGGCTGCCTTTGGA-3'      | 5'-GGAGAGGAGGCCGTTCCCCA-3'    |
| <i>Smad2</i>                                                                                                    | 5'-GGCCGTCTTCAGGTTTCACAC-3'     | 5'-CTGGGGTCTCAACTCTCTGGT-3'   |
| <i>Smad3</i>                                                                                                    | 5'-TGACAAGGTCCTCACCAGGA-3'      | 5'-CAGGCTGGTGCCTTAGTTGA-3'    |
| <i>Smad4</i>                                                                                                    | 5'-CGCTCAGCCCTTTAGTGTGT-3'      | 5'-CTCTTGGTAGAGCTGGCTGG-3'    |
| <i>Irak1</i>                                                                                                    | 5'-TCCGGAGTTCAAATCCCAGC-3'      | 5'-TACTTGTGTCCTCTGGGCCT-3'    |
| <i>Traf6</i>                                                                                                    | 5'-CTACCCGCTTTGACATGGGT-3'      | 5'-CACCTCTCCACTGCTTGTT-3'     |
| <i><math>\beta</math>-Actin</i>                                                                                 | 5'-CTAAGGCCAACCGTGAAAG-3'       | 5'-ACCAGAGGCATACAGGGACA-3'    |
| <i>Gapdh</i>                                                                                                    | 5'-TTCACCACCATGGAGAAGGC-3'      | 5'-GGCATGGACTGTGGTCATGA-3'    |
| <u>Germline transcripts</u>                                                                                     |                                 |                               |
| <i>I<math>\mu</math>-C<math>\mu</math></i>                                                                      | 5'-ACCTGGGAATGTATGGTTGTGGCTT-3' | 5'-GCAGGCAGGGCTAGATATGG-3'    |
| <i>I<math>\gamma</math>1-C<math>\gamma</math>1</i>                                                              | 5'-CTTCCAAGCCAACAGGGCAG-3'      | 5'-ACCTGTGAGGTGGCTGCGTACTT-3' |
| <i>I<math>\epsilon</math>-C<math>\epsilon</math></i>                                                            | 5'-GACGGGCCACACCATCC-3'         | 5'-CGGAGGTGGCATTGGAGG-3'      |
| <i>I<math>\alpha</math>-C<math>\alpha</math></i>                                                                | 5'-GCCATCAAGGCAGGGCCTGGG-3'     | 5'-TAATCGTGAATCAGGCAG-3'      |
| <u>Post-recombination transcripts</u>                                                                           |                                 |                               |
| <i>I<math>\mu</math>-C<math>\alpha</math></i>                                                                   | 5'-ACCTGGGAATGTATGGTTGTGGCTT-3' | 5'-TAATCGTGAATCAGGCAG-3'      |
| <u>Circle transcript</u>                                                                                        |                                 |                               |
| <i>I<math>\alpha</math>-C<math>\mu</math></i>                                                                   | 5'-GCCATCAAGGCAGGGCCTGGG-3'     | 5'-GCAGGCAGGGCTAGATATGG-3'    |
| <u>miRNA and other small RNA forward primers (used with Qiagen miScript Universal Primer as reverse primer)</u> |                                 |                               |
| <i>miR-146a</i>                                                                                                 | 5'-TGAGAACTGAATCCATGGGTT-3'     |                               |
| <i>Snord68</i>                                                                                                  | 5'-GCTGTACTGACTTGATGA-3'        |                               |
| <i>Snord70</i>                                                                                                  | 5'-TTTTGGAAGTGAATCTAAGTGATTT-3' |                               |
| <i>Rnu6</i>                                                                                                     | 5'-GCTTCGGCAGCACATATACTAAAAT-3' |                               |
| <u>ChIP</u>                                                                                                     |                                 |                               |
| <i>I<math>\alpha</math> Promoter</i>                                                                            | 5'-CGCATCTCTGTCTCAGGGTC-3'      | 5'-CTTGCCTCCACGTCATGTCT-3'    |
